# Supplementary material for: Use of Mental Health Services by Children Ages Six to 11 With Emotional or Behavioral Difficulties
Source: Atypon-hosted journal article supplement (doi:10.1176/appi.ps.201400342), 2015-05-15
Supplement: appi.ps.201400342.ds001.pdf [file appi.ps.201400342.ds001.pdf]

## Online Supplement

### Questions to identify children with emotional and behavioral difficulties (from 2010-2012 National Health Interview Survey [NHIS])

- 1) **QuestionText:** Overall, do you think that [fill1: SC name] has difficulties in any of the following areas: emotions, concentration, behavior, or being able to get along with other people?

- 1 No
- 2 Yes, minor difficulties
- 3 Yes, definite difficulties
- 4 Yes, severe difficulties
- 7 Refused
- 9 Don't know

- 2) **QuestionText:** Has [fill: SC name] had any difficulties with emotions, concentration, behavior, or getting along with others DURING THE PAST 6 MONTHS, that is since [fill month and year of 6 month reference period]?

- 1 Yes
- 2 No
- 7 Refused
- 9 Don't know

### Question to identify medication mental health services (from 2010-2012 NHIS)

- 1) **QuestionText:** DURING THE PAST 6 MONTHS, was [fill1: S.C. name] prescribed medication or taking prescription medication for difficulties with emotions, concentration, behavior, or being able to get along with others?

- 1 Yes
- 2 No
- 7 Refused
- 9 Don't know

### Questions to identify psychosocial school-based mental health services (from 2010-2012 NHIS)

- 1) **QuestionText:** Sometimes students get treatment or counseling through the school system for DIFFICULTIES WITH emotions, concentration, behavior, or being able to get along with others.

DURING THE PAST 6 MONTHS, did [fill: S.C. name] receive any treatment or counseling FROM A SCHOOL SOCIAL WORKER, SCHOOL PSYCHOLOGIST, SCHOOL NURSE, SCHOOL COUNSELOR, SPECIAL ED TEACHER, OR SCHOOL SPEECH, OCCUPATIONAL OR PHYSICAL THERAPIST?

- 1 Yes

- 2 No
- 7 Refused
- 9 Don't know

2) **QuestionText:** At any time DURING THE PAST 6 MONTHS did [fill1: S.C. name] attend a school for students with difficulties with emotions, concentration, behavior, or being able to get along with others?

- 1 Yes
- 2 No
- 7 Refused
- 9 Don't know

3) Regular schools sometimes provide programs for students with difficulties with emotions, concentration, behavior, or being able to get along with others.

DURING THE PAST 6 MONTHS, did [fill1: S.C. name] participate in a school program that was just for students with these kinds of difficulties?

- 1 Yes
- 2 No
- 7 Refused
- 9 Don't know

**Questions that identify nonschool-based psychosocial services (from 2010-2012 NHIS or 2011-2012 NHIS only as indicated below)**

1) **(2010-2012 NHIS) QuestionText:** [fill2: Now I'd like to ask about places other than {S.C. name}'s school where children and adolescents receive treatment or counseling for difficulties with emotions, concentration, behavior, or being able to get along with others.]

DURING THE PAST 6 MONTHS, did [fill1: SC name] receive treatment or counseling for these difficulties...

In an office, clinic or center in your community?

- 1 Yes
- 2 No
- 7 Refused
- 9 Don't know

1a) **(2011-2012 NHIS only) QuestionText:**

Who provided the treatment or counseling?

\*Enter all that apply, separate with commas.

- 1 Pediatrician or family doctor
- 2 Psychiatrist, psychologist, clinical social worker or psychiatric nurse
- 3 Speech, occupational or physical therapist
- 4 Religious or spiritual counselor or advisor
- 5 Probation or juvenile corrections officer or court counselor
- 6 Other
- 7 Refused
- 9 Don't know

**1b) (2011-2012 NHIS only) QuestionText:** You just told me [S.C. name] received treatment from a psychiatrist, psychologist, clinical social worker or psychiatric nurse. Who was this?  
\*Enter all that apply, separate with commas

- 1 Psychiatrist
- 2 Psychologist
- 3 Clinical social worker
- 4 Psychiatric nurse
- 7 Refused
- 9 Don't know

**2) (2010-2012 NHIS) QuestionText:** DURING THE PAST 6 MONTHS, did [fill1: SC name] receive treatment or counseling for these difficulties...

In your home, for example, from a visiting teacher or counselor?

- 1 Yes
- 2 No
- 7 Refused
- 9 Don't know

**2a) (2011-2012 NHIS only) QuestionText:** Who provided the treatment or counseling?

\*Enter all that apply, separate with commas.

- 1 Pediatrician or family doctor
- 2 Psychiatrist, psychologist, clinical social worker or psychiatric nurse
- 3 Speech, occupational or physical therapist
- 4 Religious or spiritual counselor or advisor
- 5 Probation or juvenile corrections officer or court counselor
- 6 Other
- 7 Refused
- 9 Don't know

**2b) (2011-2012 NHIS only) QuestionText:** You just told me [S.C. name] received treatment from a psychiatrist, psychologist, clinical social worker or psychiatric nurse. Who was this?

\*Enter all that apply, separate with commas

- 1 Psychiatrist
- 2 Psychologist

- 3 Clinical social worker
- 4 Psychiatric nurse
- 7 Refused
- 9 Don't know

3) (2010-2012 NHIS) **QuestionText:** DURING THE PAST 6 MONTHS, did [fill1: SC name] receive treatment or counseling for these difficulties...

In a hospital emergency room, crisis center, or emergency shelter?

- 1 Yes
- 2 No
- 7 Refused
- 9 Don't know

3a) (2011-2012 NHIS only) Who provided the treatment or counseling?

\*Enter all that apply, separate with commas.

- 1 Pediatrician or family doctor
- 2 Psychiatrist, psychologist, clinical social worker or psychiatric nurse
- 3 Speech, occupational or physical therapist
- 4 Religious or spiritual counselor or advisor
- 5 Probation or juvenile corrections officer or court counselor
- 6 Other
- 7 Refused
- 9 Don't know

3b) (2011-2012 NHIS only) **QuestionText:** You just told me [S.C. name] received treatment from a psychiatrist, psychologist, clinical social worker or psychiatric nurse. Who was this?

\*Enter all that apply, separate with commas

- 1 Psychiatrist
- 2 Psychologist
- 3 Clinical social worker
- 4 Psychiatric nurse
- 7 Refused
- 9 Don't know

4) (2010-2012 NHIS) **QuestionText:** DURING THE PAST 6 MONTHS, did [fill1: SC name] receive treatment or counseling for these difficulties...

At a day treatment program in a hospital or in your community?

- 1 Yes
- 2 No

- 7 Refused
- 9 Don't know

**4a) (2011-2012 NHIS only) Who provided the treatment or counseling?**

\*Enter all that apply, separate with commas.

- 1 Pediatrician or family doctor
- 2 Psychiatrist, psychologist, clinical social worker or psychiatric nurse
- 3 Speech, occupational or physical therapist
- 4 Religious or spiritual counselor or advisor
- 5 Probation or juvenile corrections officer or court counselor
- 6 Other
- 7 Refused
- 9 Don't know

**4b) (2011-2012 NHIS only) QuestionText:** You just told me [S.C. name] received treatment from a psychiatrist, psychologist, clinical social worker or psychiatric nurse. Who was this?

\*Enter all that apply, separate with commas

- 1 Psychiatrist
- 2 Psychologist
- 3 Clinical social worker
- 4 Psychiatric nurse
- 7 Refused
- 9 Don't know

**5) (2010-2012 NHIS) QuestionText:** DURING THE PAST 6 MONTHS, did [fill1: SC name] receive treatment or counseling for these difficulties...

Any other place?

- 1 Yes
- 2 No
- 7 Refused
- 9 Don't know

**5a) (2011-2012 NHIS only) QuestionText:** Who provided the treatment or counseling?

\*Enter all that apply, separate with commas.

- 1 Pediatrician or family doctor
- 2 Psychiatrist, psychologist, clinical social worker or psychiatric nurse
- 3 Speech, occupational or physical therapist
- 4 Religious or spiritual counselor or advisor
- 5 Probation or juvenile corrections or court counselor
- 6 Other

- 7 Refused
- 9 Don't know

**5b) (2011-2012 NHIS only) QuestionText:** You just told me [S.C. name] received treatment from a psychiatrist, psychologist, clinical social worker or psychiatric nurse. Who was this?

\*Enter all that apply, separate with commas

- 1 Psychiatrist
- 2 Psychologist
- 3 Clinical social worker
- 4 Psychiatric nurse
- 7 Refused
- 9 Don't know

#### **Question that identified children with perceived unmet need for psychosocial services**

**1) (2010-2012 NHIS) QuestionText:** DURING THE PAST 6 MONTHS, did [fill1: S.C. name] need treatment or counseling for these difficulties but didn't get it ?

- 1 Yes
- 2 No
- 7 Refused
- 9 Don't know

#### **Detailed methods for analysis**

The analysis describes sociodemographic characteristics of children with EBD, both serious and minor, as well as children without EBD. Chi-square tests were conducted to determine whether distributions of sociodemographic variables differed between serious, minor, and no EBD groups. Only bivariate analysis was provided here to describe these populations, although multivariate analyses that examine this area can be found elsewhere.(56, 64) Further, among children with serious EBD and minor EBD, we estimated the percentage of children in the four mental health service use groups (both medication and psychosocial services, psychosocial services only, medication services only, and neither medication nor psychosocial services), by sociodemographic characteristics. Chi-square tests were used to

determine whether the distribution of different service use types differed across sociodemographic groups. When Chi-square testing yielded statistically significant results, further pairwise comparisons were conducted using Z-tests. Estimates within sociodemographic groups were described in a bivariate manner; multivariate analysis was not conducted due to colinearity of independent variables, and because the focus was on the utilization by different sociodemographic groups, rather than “drivers” of these utilization patterns. The percentages of children receiving services from specific providers of school-based and nonschool-based psychosocial services were then examined. Finally, the parent reports of perceived unmet need for psychosocial services were described for children by level of EBD.

All analyses were conducted using SAS version 9.3 and SUDAAN version 11.0 statistical software to account for the complex survey design. Sampling weights were used to create nationally representative estimates. Estimates with relative standard errors greater than 30% were considered statistically unreliable. No adjustments were made for multiple comparisons.
